# Supplementary material for: Effect of Marination Time on the Antioxidant Properties of Peptides Extracted from Organic Dry-Fermented Beef
Source: Biomolecules. 2019 Oct 16;9(10):614. doi: 10.3390/biom9100614 (PMC6843305; doi:10.3390/biom9100614)
Supplement: Supplementary file 1 [file biomolecules-09-00614-s001.xlsx]

## Sheet: PEPTIDES
#	Peptide	Mass	C	S1	S2	#	Peptide	Mass	C	S1	S2	#	Peptide	Mass	C	S1	S2	#	Peptide	Mass	C	S1	S2		Peptide	Mass	C	S1	S2	#	Peptide	Mass	C	S1	S2	#	Peptide	Mass	C	S1	S2	#	Peptide	Mass	C	S1	S2	#	Peptide
Myoglobin	HKIPVK	720.46463	+	+	+	Creatine kinase-M type	VDNPGHP	734.33476	-	-	+	Actin, alpha skeletal muscle	APEEHPT	779.34497	+	+	+	Myosin-1	VADPKES	744.36537	+	+	+	Beta-elonase	SPDDPARH	893.39914	-	+	+	Glyceraldehyde-3-phosphate dehydrogenase	VGKVIPE	740.44324	-	+	+	Troponin T, fast skeletal muscle	APKIPEG	710.39627	-	+	+	Hemoglobin subunit alpha	GHGAKVAAALTK	1122.65092	+	+	+	Myozenin-1	TPIPWL
	KKGHHE	734.38236	-	+	+		THNKHK	763.40891	+	+	+		DNGSGLVK	788.40283	+	+	+		AGATVTVK	745.43341	-	-	+		IGAEVYHH	924.44536	+	+	+		IPASTGAAK	814.45485	+	+	+		FDDIQK	764.37047	-	+	+		HLDDLPGALSELSDL	1593.78861	+	-	+		TPIPWLS
	TGHPETL	753.36572	+	+	+		PFGNTHN	785.34566	-	+	+		APLNPKAN	823.45517	-	-	+		KSEKER	775.41878	-	+	+		IGAEVYHHL	1037.52942	-	-	+		EKPAKYDE	978.46579	+	+	+		EVHEPEE	867.36101	-	+	+		RVDPVNFKLLSHSLL	1736.99373	+	+	+		TPIPWLSSGEPV
	KVLGFHG	756.42827	-	+	+		GTGLRGGVH	852.45662	-	+	+		AGPSIVHR	835.46643	-	+	+		FKAGLLGL	817.50617	-	+	+		GNPELILPVP	1047.59644	+	+	+		GAAKAVGKVIP	1009.6284	-	-	+		FDDIQKK	892.46542	-	+	+		LDDLPGALSELSDLHAH	1801.88463	+	-	+		TPIPWLSSGEPVD
	FTGHPET	787.35008	+	+	+		NTHNKHK	877.45183	-	-	+		TEAPLNPK	868.46541	-	+	+		IPNETKTPG	955.49745	-	+	+		VVDQEKVDK	1058.56079	-	-	+		IPELNGKLTG	1040.58659	-	-	+		APKIPEGEK	967.53381	+	+	+		VEHLDDLPGALSELSDL	1821.89961	+	-	+		MPKFDLGPLLSEPL
	ASEDLKK	789.4232	-	+	+		TLEIYKK	893.52219	+	+	+		VAPEEHPT	878.41339	+	+	+		FPMNPPKF	976.48406	+	+	+		AGNPELILPVP	1118.63354	+	+	+		VGVNGFGRIGR	1130.63089	+	+	+		IDSHFEAR	973.46173	+	+	+		LDDLPGALSELSDLHAHK	1929.97958	+	-	+		QMPKFDLGPLLSEPL
	VAGHGQEV	795.38753	+	-	+		TGLRGGVHV	894.50357	-	-	+		SVWIGGSIL	930.51747	-	-	+		EAAPYLRKS	1033.5556	-	-	+		SRYLGKGVLK	1119.67641	+	+	+		VPTPNVSVVDL	1138.62341	+	-	+		VALKERIEK	1084.6604	-	+	+		ASHLPSDFTPAVHASLDKF	2039.01125	+	+	+		FNRTPIPWLSSGEPVD
	AIIHVLH	801.4861	-	-	+		PFGNTHNK	913.44061	+	+	+		ESAGIHETT	943.42468	-	-	+		EVHTKIISE	1054.56586	+	+	+		SVVDQEKVDK	1145.59282	-	+	+		GAAKAVGKVIPE	1138.67099	-	-	+		TAPKGKVGGRW	1155.65128	+	+	+		LDDLPGALSELSDLHAHKL	2043.06364	+	+	+		FNRTPIPWLSSGEPVDYNVD
	KKGHHEA	805.41946	+	+	+		KGGDDLDPN	929.40904	+	+	+		DEAGPSIVHR	1079.53597	-	+	+		GEAAPYLRKS	1090.57707	+	+	+		GVIKAKYGKDA	1148.65533	-	+	+		EKAGAHLKGGAK	1165.65672	+	+	+		GTAPKGKVGGRW	1212.67275	+	+	+		LASHLPSDFTPAVHASLDKF	2152.09531	-	+	+		AELPKYKSFNRTAMPYGGYEKASK
	EDLKKHG	825.43445	-	+	+		DLFDPIIQ	959.4964	-	-	+		TKQEYDEAGPS	1223.53059	+	-	+		FPMNPPKFD	1091.511	+	+	+		IGAEVYHHLK	1165.62437	+	+	+		KPAKYDEIKK	1218.69717	+	-	+		APPPPAEVPEVH	1238.62953	-	+	+		HLDDLPGALSELSDLHAHKL	2180.12256	+	-	+		ISPWEKAMGIDPQQK
	KHKIPVK	848.55959	+	-	+		GFTLDDVIQ	1006.49715	-	-	+		HQGVMVGMGQKD	1285.59074	-	-	+		VADPKESFVK	1118.59717	+	+	+		AGNPELILPVPA	1189.67065	+	+	+		EKPAKYDEIK	1219.64481	+	+	+		TAPKGKVGGRWK	1283.74623	+	+	+		SAADKGNVKAAWGKVGGHAAEYG	2243.10831	-	-	+		MTFQMPKFDLGPL
	VEADVAGHG	853.39301	+	+	+		LTLEIYKK	1006.60625	-	+	+		GIITNWDDMEK	1320.60199	-	+	+		IRIHFGTTGK	1128.64038	+	+	+		MRIGAEVYHH	1211.58695	+	+	+		AVGKVIPELNGK	1223.72376	-	-	+		GTAPKGKVGGRWK	1340.7677	+	+	+		VEHLDDLPGALSELSDLHAHKL	2408.23357	+	-	+		NRTPIPWLSSGEPVD
	SEDLKKH	855.44501	+	+	+		PFGNTHNKH	1050.49953	-	+	+		WDDMEKIWHH	1395.603	-	+	+		AAPYLRKSEK	1161.65056	+	+	+		IGAEVYHHLKG	1222.64584	+	+	+		MEKAGAHLKGGAK	1296.69721	+	+	+		RKKEEEELVALKER	1755.98422	-	+	+		AVEHLDDLPGALSELSDLHAHKL	2479.27068	+	-	+		AELPKYKSFNRTAMPYGGYEKASKR
	ADVAGHGQE	882.38316	-	-	+		ALTLEIYKK	1077.64336	+	+	+		TNWDDMEKIWH	1473.63469	-	-	+		SREVHTKIIS	1168.6564	-	+	+		VEVDLHTAKGR	1223.66223	+	+	+		EKAGAHLKGGAKR	1321.75783	+	+	+		APPPPAEVPEVHEEVHE	1861.88463	+	+	+		AWGKVGGHAAE	1081.53049	+	-	-
	GHPETLEK	909.45558	-	+	+		PFGNTHNKHK	1178.59448	+	+	+		WDDMEKIWHHT	1496.65068	-	+	+		REVHTKIISE	1210.66696	+	+	+		DLAGNPELILPVP	1346.74455	+	+	+		AVGKVIPELNGKL	1336.80782	+	+	+		APKIPEGEKVDFDDIQK	1927.98909	+	+	+		DLSHGSAQVKGHGAK	1490.75899	+	-	-
	DVAGHGQEV	910.41447	+	-	+		DRHGGFKPTDK	1256.62619	-	+	+		GSGLVKAGFAGDDAPR	1516.76341	+	+	+		FVKATVQSREG	1220.65134	-	+	+		GNPTVEVDLHTAK	1379.7045	+	+	+		EKPAKYDEIKK	1347.73976	+	+	+		KKEEEELVALKERIEK	1970.10472	+	+	+		RVDPVNFKLLSHSL	1623.90967	+	+	-
	SEDLKKHG	912.46648	-	-	+		PSNLGTGLRGGVH	1263.6684	+	+	+		RHQGVMVGMGQKDS	1528.72388	-	-	+		EAAPYLRKSEK	1290.69315	-	-	+		LKGVIKAKYGKDA	1389.83435	+	+	+		GAAKAVGKVIPELNG	1422.81944	-	-	+		APKIPEGEKVDFDDIQKK	2056.08405	+	+	+		FDLSHGSAQVKGHGAK	1637.82741	+	-	-
	HPSDFGADA	915.37227	+	-	+		AKALTLEIYKK	1276.77542	+	+	+		GSGLVKAGFAGDDAPRA	1587.80052	+	+	+		SREVHTKIISE	1297.69899	+	+	+		VYHHLKGVIKAK	1391.84012	-	+	+		VGKVIPELNGKLTG	1423.83986	+	-	+		APPPPAEVPEVHEEVHEVH	2098.01196	-	-	+		ASHLPSDFTPAVHASLDK	1891.94283	+	-	-
	YKVLGFHG	919.49159	+	+	+		PFGNTHNKHKL	1291.67854	-	+	+		TNWDDMEKIWHH	1610.6936	+	+	+		DQVFPMNPPKF	1318.638	+	+	+		DLAGNPELILPVPA	1417.78166	+	+	+		AVGKVIPELNGKLT	1437.8555	+	+	+		RKKEEEELVALKERIEK	2126.20583	-	-	+		SAADKGNVKAAWGKVGGHAAE	2023.02351	+	-	-
	ASEDLKKH	926.48212	+	+	+		IDDHFLFDKPV	1344.67142	+	+	+		FAGDDAPRAVFPSIVG	1617.81513	+	+	+		GEAAPYLRKSEK	1347.71462	-	+	+		GNPTVEVDLHTAKG	1436.72597	+	-	+		FRVPTPNVSVVDL	1441.79294	+	+	+		TAPKIPEGEKVDFDDIQKK	2157.13173	+	+	+		ASHLPSDFTPAVHASLDKFL	2152.09531	+	+	-
	LKTEAEMK	948.49498	+	+	+		PFGNTHNKHKLN	1405.72147	+	+	+		PRHQGVMVGMGQKDS	1625.77664	+	+	+		ITGESGAGKTVNTK	1361.71506	-	-	+		MRIGAEVYHHLK	1452.76596	+	+	+		LEKPAKYDEIKK	1460.82382	+	+	+		ARKKEEEELVALKERIEK	2197.24294	-	+	+		ASHLPSDFTPAVHASLDKFLAN	2337.17534	+	+	-
	KFDKFKH	948.51813	-	+	+		DHFLFDKPVSPL	1413.72926	-	+	+		KSYELPDGQVITIGN	1632.83589	+	-	+		DQVFPMNPPKFD	1433.66495	+	+	+		ADLAGNPELILPVPA	1488.81877	-	-	+		AVGKVIPELNGKLTG	1494.87697	+	+	+		DSHFEARKKEEEELVALKER	2442.25023	-	-	+		ASHLPSDFTPAVHASLDKFLANVST	2624.32347	+	-	-
	ISDAIIHVL	979.57022	+	+	+		IDDHFLFDKPVS	1431.70345	+	+	+		YNELRVAPEEHPTL	1666.83145	-	-	+		ITGESGAGKTVNTKR	1517.81616	-	-	+		MRIGAEVYHHLKG	1509.78743	-	+	+		TTMEKAGAHLKGGAK	1498.79257	+	+	+		PRPRLTAPKIPEGEKVDFDDIQKK	2776.52353	+	+	+		DLPGALSELSDLHAHKL	1814.95264	-	+	-
	ASEDLKKHG	983.50359	+	+	+		EEYPDLSKHNNH	1481.65349	+	+	+		GFAGDDAPRAVFPSIVG	1674.83659	-	+	+		DQVFPMNPPKFDK	1561.7599	-	+	+		FRAAVPSGASTGIYE	1524.75725	+	+	+		FRVPTPNVSVVDLT	1542.84062	+	+	+		KPRPRLTAPKIPEGEKVDFDDIQK	2776.52353	+	+	+		VLSAADKGNVKAAWGKVGGHAAEYGAEALERM	3255.64583	-	+	-
	HAKHPSDFG	994.46208	+	+	+		SKHPKFEEILTR	1483.81468	+	+	+		ESAGIHETTYNSIMK	1679.78246	-	-	+		EDQVFPMNPPKFD	1562.70754	+	+	+		RGNPTVEVDLHTAK	1535.8056	+	+	+		STGAAKAVGKVIPELN	1553.87769	+	+	+		EKPRPRLTAPKIPEGEKVDFDDIQK	2905.56612	+	-	+
	GLSDGEWQL	1003.46108	+	-	+		DVIQTGVDNPGHPF	1494.71034	+	+	+		ITKQEYDEAGPSIVH	1685.82605	-	-	+		FPMNPPKFDKIED	1576.75955	+	+	+		IGAEVYHHLKGVIK	1562.89328	-	+	+		GPLKGILGYTEDQVVS	1674.88286	-	-	+		EKPRPRLTAPKIPEGEKVDFDDIQKK	3033.66107	-	+	+
	TGHPETLEK	1010.50327	+	+	+		IDDHFLFDKPVSP	1528.75621	+	+	+		TNWDDMEKIWHHT	1711.74129	+	+	+		PKESFVKATVQSREG	1661.87367	+	+	+		RGNPTVEVDLHTAKG	1592.82707	-	-	+		RVIISAPSADAPMFVM	1703.87387	-	+	+		AGTAPKGKVGGRW	1283.70985	+	+	-
	LKTEAEMKA	1019.53209	-	+	+		LIDDHFLFDKPVS	1544.78751	-	-	+		ITNWDDMEKIWHH	1723.77766	+	+	+		VKEDQVFPMNPPKF	1674.84396	-	-	+		GNPTVEVDLHTAKGR	1592.82707	+	+	+		SGKVDIVAINDPFIDL	1714.91415	+	-	+		TAPKIPEGEKVDFDDIQK	2029.03677	+	+	-
	ANKHKIPVK	1033.63962	-	+	+		HMAKALTLEIYKK	1544.87482	+	-	+		GQKDSYVGDEAQSKRG	1723.81253	-	+	+		EDQVFPMNPPKFDK	1690.80249	+	+	+		FRAAVPSGASTGIYEA	1595.79436	+	+	+		IIPASTGAAKAVGKVIPE	1721.0087	+	+	+		APKIPEGEKVDFDDIQKKR	2212.18515	+	+	-
	GKVEADVAGHG	1038.50943	+	+	+		VAGDEESYTVFKDL	1571.73552	+	+	+		TKQEYDEAGPSIVHR	1728.84309	+	+	+		VADPKESFVKATVQSR	1760.94209	+	+	+		SRGNPTVEVDLHTAK	1622.83763	+	+	+		GAAKAVGKVIPELNGKLT	1765.04614	-	-	+		LTAPKIPEGEKVDFDDIQKK	2270.21579	+	-	-
	EKFDKFKH	1077.56072	+	+	+		LIDDHFLFDKPVSP	1641.84027	-	-	+		AGFAGDDAPRAVFPSIVG	1745.8737	-	+	+		FQKPKPAKGKAEAHFS	1769.95766	+	-	+		IQIVGDDLTVTNPKR	1667.92064	-	-	+		GVNHEKYNNTLKIVSN	1828.94313	-	+	+		FDDIQKKR	1048.56653	-	+	-
	TVLTALGGILK	1084.68559	-	-	+		IDDHFLFDKPVSPL	1641.84027	+	+	+		GRPRHQGVMVGMGQKD	1751.86719	-	-	+		TVKEDQVFPMNPPKF	1775.89165	-	+	+		SRGNPTVEVDLHTAKG	1679.8591	+	+	+		IPASTGAAKAVGKVIPELN	1835.05162	+	-	+		APKIPEGEKVD	1181.62918	-	+	-
	LKTEAEMKAS	1106.56412	-	+	+		DKETPSGFTLDDVIQ	1663.79411	+	+	+		EKSYELPDGQVITIGN	1761.87848	+	-	+		VKEDQVFPMNPPKFD	1789.87091	+	+	+		FRAAVPSGASTGIYEAL	1708.87842	+	+	+		LTGMAFRVPTPNVSVVDL	1915.02374	-	-	+		IDSHFEARKK	1229.65164	-	+	-
	VEADVAGHGQE	1110.49417	+	+	+		PFGNTHNKHKLNFK	1680.88484	-	-	+		RPRHQGVMVGMGQKDS	1781.87775	-	-	+		YNITGWLDKNKDPLN	1789.89987	+	+	+		DSRGNPTVEVDLHTAK	1737.86458	+	+	+		IIPASTGAAKAVGKVIPELN	1948.13568	-	+	+		AGTAPKGKVGGRWK	1411.80481	-	+	-
	KASEDLKKHG	1111.59854	+	+	+		TEQEQQQLIDDHFL	1742.81114	-	-	+		SYELPDGQVITIGNER	1789.88463	+	+	+		GKMQGTLEDQIISANPL	1813.92438	-	-	+		HIADLAGNPELILPVPA	1738.96175	+	-	+		STGAAKAVGKVIPELNGKLT	1953.12585	+	+	+		APKIPEGEKVDFDDIQ	1799.89414	-	+	-
	HPSDFGADAQA	1114.46796	-	-	+		LIDDHFLFDKPVSPL	1754.92433	+	+	+		ITNWDDMEKIWHHT	1824.82535	+	+	+		ADPKESFVKATVQSREG	1847.93773	+	+	+		RGNPTVEVDLHTAKGR	1748.92818	+	+	+		VVKQASEGPLKGILGYTED	2003.05751	-	-	+		LTAPKIPEGEKVDFDDIQK	2142.12083	-	+	-
	ISDAIIHVLH	1116.62913	+	+	+		AHLSKHPKFEEILTR	1804.99477	+	+	+		IVLDSGDGVTHNVPIYE	1826.90506	-	-	+		VTVKEDQVFPMNPPKF	1874.96007	-	+	+		RIEEALGDKAVFAGRK	1758.97403	-	+	+		IIPASTGAAKAVGKVIPELNG	2005.15715	-	-	+		FEARKKEEEELVALKERIEK	2473.35394	-	+	-
	AQYKVLGFHG	1118.58728	+	-	+		KAEEEYPDLSKHNNH	1809.82814	+	+	+		IITNWDDMEKIWHH	1836.86173	-	+	+		VADKAAYLQGLNSADLLK	1889.02579	+	+	+		DSRGNPTVEVDLHTAKG	1794.88605	+	+	+		STGAAKAVGKVIPELNGKLTG	2010.14732	+	+	+		IDSHFEARKKEEEELVALKER	2555.33429	-	+	-
	AEMKASEDLK	1120.54338	+	+	+		EEYPDLSKHNNHMAK	1811.82604	+	-	+		ITKQEYDEAGPSIVHR	1841.92716	+	+	+		VADPKESFVKATVQSRE	1889.98468	+	-	+		RHIADLAGNPELILPVP	1824.02574	-	-	+		IPASTGAAKAVGKVIPELNGKLTG	2291.32126	+	-	+		PRPRLTAPKIPEGEKVDFDDIQK	2648.42857	-	+	-
	FISDAIIHVL	1126.63864	-	+	+		FKAEEEYPDLSKHNN	1819.83765	-	+	+		MGQKDSYVGDEAQSKRG	1854.85301	-	+	+		VKEDQVFPMNPPKFDK	1917.96587	+	+	+		SRGNPTVEVDLHTAKGR	1835.96021	+	+	+		IIPASTGAAKAVGKVIPELNGKLTG	2404.40532	-	-	+
	FTGHPETLEK	1157.57169	+	+	+		RDKETPSGFTLDDVIQ	1819.89522	+	+	+		LEKSYELPDGQVITIGN	1874.96254	+	+	+		DQVFPMNPPKFDKIED	1918.9135	+	-	+		LDSRGNPTVEVDLHTAK	1850.94864	+	+	+		EKPAKYDEIKKVVKQASEGPLK	2484.39511	-	+	+
	ILKKKGHHEA	1159.68254	-	-	+		TLDDVIQTGVDNPGHPF	1823.86903	+	+	+		IVLDSGDGVTHNVPIYEG	1883.92653	-	+	+		VADPKESFVKATVQSREG	1947.00615	+	+	+		MRIEEALGDKAVFAGRK	1890.01451	+	+	+		AVGKVIPELNGKLTGMAFRVPTPNVS	2694.48909	-	-	+
	GKVEADVAGHGQ	1166.56801	+	+	+		FTLDDVIQTGVDNPGHP	1823.86903	+	+	+		GIITNWDDMEKIWHH	1893.88319	-	+	+		VADKAAYLQGLNSADLLKA	1960.0629	-	+	+		RHIADLAGNPELILPVPA	1895.06285	+	+	+		AVGKVIPELNGKLTGMAFRVPTPNVSV	2793.55751	-	-	+
	HAKHPSDFGAD	1180.52614	+	-	+		MTEQEQQQLIDDHFL	1873.85162	+	+	+		IITNWDDMEKIWHHT	1937.90941	-	+	+		AIPEGQFIDSKKASEKLL	1973.0833	+	+	+		LDSRGNPTVEVDLHTAKG	1907.97011	+	+	+		TVDGPSGK	759.3763	+	-	-
	MKASEDLKKH	1185.61755	+	+	+		GFTLDDVIQTGVDNPGHP	1880.8905	+	+	+		RMQKEITALAPSTMKIK	1945.08522	-	+	+		EDQVFPMNPPKFDKIED	2047.95609	+	+	+		DSRGNPTVEVDLHTAKGR	1950.98715	+	+	+		EKAGAHLKG	909.50319	+	+	-
	AAQYKVLGFHG	1189.62439	+	+	+		LAHLSKHPKFEEILTR	1918.07883	+	+	+		SLEKSYELPDGQVITIGN	1961.99457	+	+	+		YKVLNASAIPEGQFIDSKK	2107.13132	-	-	+		IQIVGDDLTVTNPKRIAQ	1980.10039	-	-	+		AVGKVIPEL	924.56441	+	-	-
	ASEDLKKHGNT	1198.59419	+	+	+		LRDKETPSGFTLDDVIQ	1932.97928	+	+	+		IVGRPRHQGVMVGMGQKD	1964.01967	-	+	+		VTVKEDQVFPMNPPKFDK	2118.08197	-	+	+		IKNYPVVSIEDPFDQDD	1992.93166	+	+	+		AVGKVIPELN	1038.60733	+	-	-
	GGILKKKGHHE	1202.68837	+	+	+		FTLDDVIQTGVDNPGHPF	1970.93745	+	+	+		ITKQEYDEAGPSIVHRK	1970.02211	+	+	+		TEAGATVTVKEDQVFPMNPPK	2258.12529	-	-	+		LDSRGNPTVEVDLHTAKGR	2064.07121	+	+	+		VGKVIPELNGKLT	1366.81839	+	-	-
	VEADVAGHGQEV	1209.56259	-	-	+		GFTLDDVIQTGVDNPGHPF	2027.95892	+	+	+		IVGRPRHQGVMVGMGQKD + Oxidation (M)	1980.01459	-	-	+		VKEDQVFPMNPPKFDKIED	2275.11946	+	+	+		KNYPVVSIEDPFDQDDW	2065.92691	-	+	+		RVPTPNVSVVDLT	1395.7722	+	-	-
	GLSDGEWQLVL	1215.61356	+	+	+		FKAEEEYPDLSKHNNHMAK	2287.06911	-	-	+		IGMESAGIHETTYNSIMK	1980.92847	-	-	+		VTVKEDQVFPMNPPKFDKIED	2475.23557	+	+	+		DSRGNPTVEVDLHTAKGRF	2098.05557	-	-	+		IPASTGAAKAVGKVIPELNGKL	2133.25211	+	-	-
	GILKKKGHHEA	1216.70401	-	+	+		ETPSGFTLDDVIQTGVDNPGHP	2295.06557	+	+	+		GIITNWDDMEKIWHHT	1994.93088	-	+	+		VTKGQTVEQVYNAVGALAKAVYDK	2551.36459	-	-	+		KNYPVVSIEDPFDQDDWA	2136.96402	+	-	+		IPASTGAAKAVGKVIPELNGKLT	2234.29979	+	-	-
	KVEADVAGHGQE	1238.58913	-	+	+		TPSGFTLDDVIQTGVDNPGHPF	2313.0914	+	+	+		GSGLVKAGFAGDDAPRAVFPS	2018.02216	+	+	+		GKMQGTLEDQIISANPLLEAFGNAK	2644.35301	-	-	+		ILDSRGNPTVEVDLHTAKGR	2177.15527	+	+	+		RVIISAPSADAPMFVMGVNHEK	2368.20314	+	-	-
	FRNDMAAQYK	1242.58151	-	+	+		YPLKSMTEQEQQQLIDDHF	2349.0947	-	-	+		EKSYELPDGQVITIGNER	2047.02217	+	+	+		YKVLNASAIPEGQFIDSKKASEKLL	2748.50612	+	+	+		KNYPVVSIEDPFDQDDWAT	2238.0117	+	+	+		FGIVEGLM	864.44153	-	+	-
	MKASEDLKKHG	1242.63902	+	+	+		VEMEKKLEKGQSIDDMIPAQK	2416.23413	+	+	+		SSLEKSYELPDGQVITIGN	2049.0266	-	-	+		IAVTGEKKKEEPTSGKMQGTLEDQIISANPLLEAFGNAK	4142.15686	+	-	+		GNPELILPVPAFNVINGGSHAGN	2286.17567	+	-	+		INDPFIDL	945.48074	-	+	-
	AEMKASEDLKK	1248.63834	+	+	+		ETPSGFTLDDVIQTGVDNPGHPF	2442.13399	+	+	+		IVGRPRHQGVMVGMGQKDS	2051.0517	-	+	+		PRVKVGN	768.46062	+	-	-		ENNEALELLKTAIQAAGYPDK	2287.16952	+	-	+		TTVHAITATQK	1169.64044	-	+	-
	HAKHPSDFGADA	1251.56325	+	+	+		YYPLKSMTEQEQQQLIDDHF	2512.15802	+	+	+		IVGRPRHQGVMVGMGQKDS + Oxidation (M)	2067.04662	-	-	+		VHTKIISE	925.52327	+	-	-		EILDSRGNPTVEVDLHTAKGR	2306.19786	+	+	+		KVVKQASEGPLK	1282.76086	-	+	-
	EFISDAIIHVL	1255.68123	+	+	+		LNFKAEEEYPDLSKHNNHMAK	2514.19609	-	+	+		RVAPEEHPTLLTEAPLNPK	2111.13747	+	-	+		TEAGATVTVK	975.52368	+	+	-		VGDEGGFAPNILENNEALELLK	2341.18012	+	+	+		RVIISAPSADAPM	1326.69655	-	+	-
	SHANKHKIPVK	1257.73056	+	+	+		EQEQQQLIDDHFLFDKPVSPL	2525.24382	+	-	+		SSSLEKSYELPDGQVITIGN	2136.05862	+	-	+		EKERIEAQN	1115.55705	+	-	-		IKNYPVVSIEDPFDQDDWAT	2351.09576	-	-	+		KVVKQASEGPLKG	1339.78233	-	+	-
	FISDAIIHVLH	1263.69756	-	-	+		DKETPSGFTLDDVIQTGVDNPGHP	2538.18747	+	+	+		WITKQEYDEAGPSIVHRK	2156.10142	+	+	+		SEKERIEAQN	1202.58908	+	+	-		LENNEALELLKTAIQAAGYPDK	2400.25359	+	-	+		VKVGVNGFGRIGR	1357.79427	-	+	-
	GGILKKKGHHEA	1273.72548	+	+	+		MTEQEQQQLIDDHFLFDKPVS	2547.19516	+	+	+		LRVAPEEHPTLLTEAPLNPK	2224.22153	+	+	+		GKVTAKTEAGATV	1231.67722	+	-	-		AREILDSRGNPTVEVDLHTAKGR	2533.33608	-	+	+		GPLKGILGYTEDQ	1389.71399	-	+	-
	GKVEADVAGHGQE	1295.6106	+	+	+		MVEMEKKLEKGQSIDDMIPAQK	2547.27461	+	+	+		PSIVGRPRHQGVMVGMGQKDS + Oxidation (M)	2251.13141	-	-	+		KSEKERIEAQN	1330.68404	+	+	-		YRNGKYDLDFKSPDDPARHISG	2550.22513	-	-	+		STGAAKAVGKVIPELNG	1610.89916	-	+	-
	ASEDLKKHGNTV	1297.66261	+	-	+		GKYYPLKSMTEQEQQQLIDDH	2550.20602	+	+	+		MWITKQEYDEAGPSIVHRK	2287.14191	-	+	+		GTLEDQIISANPL	1369.70889	+	+	-		YDLDFKSPDDPARHISGEKLGELYK	2892.42935	-	-	+		IIPASTGAAKAVGKVIPEL	1834.09276	-	+	-
	GHPETLEKFDK	1299.64591	-	-	+		KETPSGFTLDDVIQTGVDNPGHPF	2570.22894	+	+	+		GSGLVKAGFAGDDAPRAVFPSIVG	2287.19611	+	+	+		EDQVFPMNPPKF	1447.68059	+	-	-		IADLAGNPELILPVPAFNVINGGSHAGNK	2897.53992	-	+	+		NIIPASTGAAKAVGKVIPE	1835.05162	-	+	-
	ISDAIIHVLHAK	1315.7612	+	+	+		TEQEQQQLIDDHFLFDKPVSPL	2626.2915	+	+	+		RVAPEEHPTLLTEAPLNPKAN	2296.2175	-	-	+		ERIEAQNKPFDAK	1544.79466	+	-	-		YGKDATNVGDEGGFAPNILENNEALELLK	3090.51453	-	-	+		STGAAKAVGKVIPELNGKL	1852.07817	-	+	-
	MAAQYKVLGFHG	1320.66487	+	-	+		DVSNADRLGSSEVEQVQLVVDGVKL	2655.37155	+	+	+		RVAPEEHPTLLTEAPLNPKANR	2452.3186	-	-	+		TSVFVADPKESFVK	1552.81372	+	-	-		ELRDGDKSRYLGKGVLKAVEHINKTLGPA	3163.74654	-	-	+		IIPASTGAAKAVGKVIPELNGK	2133.25211	-	+	-
	TEAEMKASEDLK	1350.63365	+	+	+		KGKYYPLKSMTEQEQQQLIDDH	2678.30098	-	-	+		QQMWITKQEYDEAGPSIVHRK	2543.25906	-	-	+		DQIISANPLLEAFGNAK	1799.94173	+	-	-		NPELILPVP	990.57497	+	-	-		EKPAKYDEIKKVVKQASEGPL	2356.30016	-	+	-
	WGKVEADVAGHGQ	1352.64732	+	-	+		DKETPSGFTLDDVIQTGVDNPGHPF	2685.25589	+	+	+		EITALAPSTMKIKIIAPPERKYS	2556.43486	-	-	+		QVFPMNPPKFDKIED	1803.88655	+	+	-		PTVEVDLHTAKGR	1421.76268	+	+	-
	FKHLKTEAEMK	1360.71727	-	+	+		RDKETPSGFTLDDVIQTGVDNPGHP	2694.28857	+	+	+		SGGTTMYPGIADRMQKEITALAPST	2595.26726	-	-	+		SAIPEGQFIDSKKASEKLL	2060.11533	+	-	-		AVEHINKTLGPALLE	1603.89333	+	-	-
	HAKHPSDFGADAQ	1379.62183	+	+	+		GKYYPLKSMTEQEQQQLIDDHF	2697.27445	+	+	+		YNELRVAPEEHPTLLTEAPLNPK	2630.37036	-	+	+		GKMQGTLEDQIISANPLLEA	2127.08814	+	-	-		MRIEEALGDKAVFAGRKFRNPK	2532.37468	+	-	-
	AEMKASEDLKKH	1385.69725	+	+	+		SMTEQEQQQLIDDHFLFDKPVSP	2731.27995	+	+	+		YNELRVAPEEHPTLLTEAPLNPKAN	2815.45039	+	-	+		TVKEDQVFPMNPPKFDKIED	2376.16715	+	+	-		SVVDQEKVDKFMIELDGTENKSK	2638.31598	+	-	-
	ESHANKHKIPVK	1386.77315	+	-	+		MTEQEQQQLIDDHFLFDKPVSPL	2757.33199	+	+	+		SGGTTMYPGIADRMQKEITALAPSTMK	2854.4027	-	+	+		TSVFVADPKESFVKATVQSREG	2381.2227	+	-	-		DLDFKSPDDPARHISGEKLGELYK	2729.36603	+	-	-
	EFISDAIIHVLH	1392.74014	+	+	+		HKLNFKAEEEYPDLSKHNNHMAK	2779.34996	+	+	+		VGRPRHQGVMVGMGQKDSYVGDEAQSK	2915.41306	-	-	+		YNITGWLDKNKDPLNETVVGL	2388.23251	+	+	-		GKYDLDFKSPDDPARHISGEKLGELYK	3077.54578	+	-	-
	GKVEADVAGHGQEV	1394.67902	+	+	+		DKETPSGFTLDDVIQTGVDNPGHPFI	2798.33995	+	-	+		IVLDSGDGVTHNVPIYEGYALPHAIMR	2936.48546	-	-	+		VTGEKKKEEPTSGKMQGTLEDQ	2419.19005	+	-	-		LKGVIKAK	855.59055	-	+	-
	TGHPETLEKFDK	1400.69359	-	+	+		LRDKETPSGFTLDDVIQTGVDNPGHP	2807.37264	+	+	+		IVGRPRHQGVMVGMGQKDSYVGDEAQSK	3028.49712	-	-	+		TVTVKEDQVFPMNPPKFDKIED	2576.28325	+	-	-		GNPELILPVPA	1118.63354	-	+	-
	GGILKKKGHHEAE	1402.76807	+	+	+		GKYYPLKSMTEQEQQQLIDDHFL	2810.35851	+	+	+		SGGTTMYPGIADRMQKEITALAPSTMKIK	3095.58171	+	+	+		AVTGEKKKEEPTSGKMQGTLEDQIISANPLLEAFGNAK	4029.0728	+	-	-		SRYLGKGVLKA	1190.71352	-	+	-
	TLEKFDKFKHL	1404.77652	-	-	+		KGKYYPLKSMTEQEQQQLIDDHF	2825.3694	+	-	+		PSIVGRPRHQGVMVGMGQKDSYVGDEAQSK	3212.58191	+	+	+		GGPKKGGKKK	983.62398	-	+	-		ILPVGASSFREA	1245.67172	-	+	-
	SHANKHKIPVKY	1420.79388	-	+	+		FKGKYYPLKSMTEQEQQQLIDDH	2825.3694	+	+	+		PSIVGRPRHQGVMVGMGQKDSYVGDEAQSKRG	3425.70448	-	-	+		GGPKKGGKKKG	1040.64545	-	+	-		LKGVIKAKYGKD	1318.79724	-	+	-
	AEMKASEDLKKHG	1442.71872	+	+	+		RDKETPSGFTLDDVIQTGVDNPGHPF	2841.357	+	+	+		ESAGIHETTYNS	1307.56296	+	-	-		AKTEAGATVTVK	1174.65575	-	+	-		AGNPELILPVPAF	1336.73908	-	+	-
	HAKHPSDFGADAQA	1450.65894	+	+	+		PFGNTHNKHKLNFKAEEEYPDLSK	2842.40379	-	-	+		EITALAPSTMKIK	1401.7901	+	+	-		AVFGEAAPYLR	1192.62404	-	+	-		MILPVGASSFREA	1376.7122	-	+	-
	MKASEDLKKHGNT	1457.72963	+	+	+		SMTEQEQQQLIDDHFLFDKPVSPL	2844.36401	+	+	+		RPRHQGVMVGMGQKD	1694.84572	+	+	-		RIHFGTTGKLA	1199.67749	-	+	-		AEVYHHLKGVIK	1392.78775	-	+	-
	AESHANKHKIPVK	1457.81026	-	+	+		MTEQEQQQLIDDHFLFDKPVSPLL	2870.41605	-	+	+		VGRPRHQGVMVGMGQKD	1850.93561	+	-	-		QVFPMNPPKF	1203.61105	-	+	-		IADLAGNPELILPVPA	1601.90283	-	+	-
	KTEAEMKASEDLK	1478.72861	+	+	+		EEYPDLSKHNNHMAKALTLEIYKK	2871.45883	-	+	+		TNWDDMEKIWHHTF	1858.80971	+	+	-		FPMNPPKFDK	1219.60596	-	+	-		IADLAGNPELILPVPAF	1748.97125	-	+	-
	TEAEMKASEDLKK	1478.72861	+	+	+		KLRDKETPSGFTLDDVIQTGVDNPGHP	2935.46759	+	+	+		PSIVGRPRHQGVMVGMGQKDS	2235.13649	+	-	-		VKHWPWMKL	1223.66374	-	+	-		MRIGAEVYHHLKGVIK	1850.03487	-	+	-
	WGKVEADVAGHGQE	1481.68991	+	+	+		EFKGKYYPLKSMTEQEQQQLIDDH	2954.41199	-	-	+		WIGGSIL	744.41702	-	+	-		VTAKTEAGATVTVK	1374.77185	-	+	-		MRIGAEVYHHLKGVIKAK	2049.16693	-	+	-
	HAKHPSDFGADAQAA	1521.69605	+	+	+		LRDKETPSGFTLDDVIQTGVDNPGHPF	2954.44106	+	+	+		VKAGFAGDDAPR	1202.60439	-	+	-		AVFGEAAPYLRKS	1407.75102	-	+	-		DSRGNPTVEVDLHTAKGRFR	2254.15668	-	+	-
	AWGKVEADVAGHGQE	1552.72702	+	+	+		FKGKYYPLKSMTEQEQQQLIDDHF	2972.43782	-	+	+		DMEKIWHHTF	1342.61284	-	+	-		QVFPMNPPKFDK	1446.73296	-	+	-		FKSPDDPARHISGEKLGELYK	2386.22807	-	+	-
	AEMKASEDLKKHGN	1556.76164	+	+	+		GEFKGKYYPLKSMTEQEQQQLIDDH	3011.43346	+	+	+		YDEAGPSIVHRK	1370.69424	-	+	-		SGEAEGGPKKGGKKK	1456.79976	-	+	-		RIEEALGDKAVFAGRKFRNPK	2401.3342	-	+	-
	LAESHANKHKIPVK	1570.89432	+	+	+		KKLRDKETPSGFTLDDVIQTGVDNPGHP	3063.56255	+	+	+		IGMESAGIHETTY	1407.63402	-	+	-		VADPKESFVKATVQ	1517.80896	-	+	-		PVGASSFREAMRIGAEVYHHLK	2454.259	-	+	-
	EAEMKASEDLKKHG	1571.76131	-	-	+		LRDKETPSGFTLDDVIQTGVDNPGHPFI	3067.52512	+	+	+		LPDGQVITIGNER	1410.74669	-	+	-		AGLLGLLEEMRDEK	1572.8181	-	+	-		IADLAGNPELILPVPAFNVINGGSHAGNKLA	3081.66109	-	+	-
	GHPETLEKFDKFK	1574.80928	-	-	+		KLRDKETPSGFTLDDVIQTGVDNPGHPF	3082.53601	+	+	+		TEAPLNPKANREK	1466.78409	-	+	-		GTLEDQIISANPLLEA	1682.87265	-	+	-		LAGNPELILPVPAFNVINGGSHAGNKLAMQEF	3317.72304	-	+	-
	WGKVEADVAGHGQEV	1580.75833	+	+	+		FKGKYYPLKSMTEQEQQQLIDDHFL	3085.52188	+	+	+		GQKDSYVGDEAQSK	1510.68996	-	+	-		FQKPKPAKGKAEAHF	1682.92563	-	+	-
	LKTEAEMKASEDLK	1591.81267	+	+	+		PFGNTHNKHKLNFKAEEEYPDLSKHN	3093.50563	-	+	+		AVFPSIVGRPRHQG	1519.83719	-	+	-		FKAGLLGLLEEMRDEK	1847.98148	-	+	-				49	65	65
	KTEAEMKASEDLKK	1606.82356	+	+	+		TGEFKGKYYPLKSMTEQEQQQLIDDH	3112.48114	+	+	+		ELPDGQVITIGNER	1539.78928	-	+	-		SGKMQGTLEDQIISANPL	1900.95641	-	+	-
	TEAEMKASEDLKKH	1615.78752	+	+	+		YPLKSMTEQEQQQLIDDHFLFDKPVS	3135.52229	-	-	+		SGGTTMYPGIADRMQ	1583.70721	-	+	-		GTLEDQIISANPLLEAFGNAK	2200.13753	-	+	-
	AESHANKHKIPVKY	1620.87358	-	-	+		GEFKGKYYPLKSMTEQEQQQLIDDHF	3158.50188	+	+	+		NGSGLVKAGFAGDDAPR	1630.80634	-	+	-		LGKSNNFQKPKPAKGKAEAHFSLIH	2746.50305	-	+	-
	GGILKKKGHHEAEVK	1629.93144	-	+	+		LRDKETPSGFTLDDVIQTGVDNPGHPFIM	3198.5656	+	+	+		MGQKDSYVGDEAQSK	1641.73044	-	+	-
	AIIHVLHAKHPSDFG	1640.87871	-	-	+		PFGNTHNKHKLNFKAEEEYPDLSKHNN	3207.54855	-	+	+		YVGDEAQSKRGILTL	1648.87842	-	+	-
	HAKHPSDFGADAQAAM	1652.73653	+	+	+		KKLRDKETPSGFTLDDVIQTGVDNPGHPF	3210.63097	+	+	+		GQKDSYVGDEAQSKR	1666.79106	-	+	-
	AEMKASEDLKKHGNT	1657.80933	+	+	+		YKKLRDKETPSGFTLDDVIQTGVDNPGHP	3226.62587	+	+	+		ELPDGQVITIGNERF	1686.8577	-	+	-
	KHPSDFGADAQAAMSK	1659.76749	+	-	+		TGEFKGKYYPLKSMTEQEQQQLIDDHF	3259.54956	+	+	+		YELPDGQVITIGNER	1702.8526	-	+	-
	NAWGKVEADVAGHGQE	1666.76994	+	+	+		GEFKGKYYPLKSMTEQEQQQLIDDHFL	3271.58594	+	+	+		DNGSGLVKAGFAGDDAPR	1745.83328	-	+	-
	TEAEMKASEDLKKHG	1672.80899	+	+	+		PFGNTHNKHKLNFKAEEEYPDLSKHNNH	3344.60747	-	+	+		NWDDMEKIWHHTF	1757.76202	-	+	-
	TGHPETLEKFDKFK	1675.85696	+	+	+		TGEFKGKYYPLKSMTEQEQQQLIDDHFL	3372.63362	+	+	+		VLDSGDGVTHNVPIYEG	1770.84247	-	+	-
	TEAEMKASEDLKKHG + Oxidation (M)	1688.80391	-	-	+		YKKLRDKETPSGFTLDDVIQTGVDNPGHPF	3373.69429	+	+	+		FAGDDAPRAVFPSIVGR	1773.91623	-	+	-
	WGKVEADVAGHGQEVL	1693.84239	+	+	+		EIYKKLRDKETPSGFTLDDVIQTGVDNPGHP	3468.75252	+	-	+		LVKAGFAGDDAPRAVFPS	1816.94719	-	+	-
	FTGHPETLEKFDKF	1694.83043	+	+	+		IYKKLRDKETPSGFTLDDVIQTGVDNPGHPF	3486.77835	+	+	+		SGGTTMYPGIADRMQKE	1840.84476	-	+	-
	GHPETLEKFDKFKH	1711.8682	+	+	+		YYPLKSMTEQEQQQLIDDHFLFDKPVSPL	3508.72244	-	-	+		KSYELPDGQVITIGNER	1917.97958	-	+	-
	LKTEAEMKASEDLKK	1719.90762	+	+	+		EIYKKLRDKETPSGFTLDDVIQTGVDNPGHPF	3615.82094	+	+	+		VGRPRHQGVMVGMGQKDS	1937.96764	-	+	-
	HLKTEAEMKASEDLK	1728.87158	+	+	+		GVDNPGHP	791.35623	+	+	-		GIVLDSGDGVTHNVPIYEG	1940.948	-	+	-
	AKHPSDFGADAQAAMSK	1730.8046	+	+	+		DPIIQDR	855.44502	+	-	-		ITNWDDMEKIWHHTF	1971.89377	-	+	-
	VLHAKHPSDFGADAQAA	1733.84853	+	+	+		DRHGGFKP	912.4566	+	+	-		VMVGMGQKDSYVGDEAQSK	2027.92923	-	+	-
	LAESHANKHKIPVKY	1733.95764	-	+	+		LGTGLRGGVH	965.54068	+	+	-		WITKQEYDEAGPSIVHR	2028.00647	-	+	-
	KTEAEMKASEDLKKH	1743.88248	+	+	+		TGLRGGVHVK	1022.59853	+	-	-		IITNWDDMEKIWHHTF	2084.97783	-	+	-
	FDKFKHLKTEAEMK	1750.90759	+	+	+		DLFDPIIQDR	1230.62445	+	-	-		GIITNWDDMEKIWHHTF	2141.9993	-	+	-
	AEMKASEDLKKHGNTV	1756.87775	+	-	+		DVSNADRLGSSE	1248.55821	+	+	-		MGQKDSYVGDEAQSKRGILT	2182.06882	-	+	-
	NAWGKVEADVAGHGQEV	1765.83836	+	+	+		AGDEESYTVFKDL	1472.6671	+	-	-		VMVGMGQKDSYVGDEAQSKRG	2241.0518	-	+	-
	GGILKKKGHHEAEVKH	1766.99036	+	+	+		DDHFLFDKPVSPL	1528.75621	+	+	-		SLEKSYELPDGQVITIGNER	2247.13826	-	+	-
	LNAWGKVEADVAGHGQE	1779.854	+	-	+		SKHPKFEEILTRL	1596.89874	+	-	-		YANNVMSGGTTMYPGIADRMQK	2404.09735	-	+	-
	TEAEMKASEDLKKHGN	1786.85191	+	+	+		TLDDVIQTGVDNPGHP	1676.80061	+	-	-		LRVAPEEHPTLLTEAPLNPKAN	2409.30156	-	+	-
	EAEMKASEDLKKHGNT	1786.85191	-	-	+		AEEEYPDLSKHNNH	1681.73319	+	+	-		LRVAPEEHPTLLTEAPLNPKANR	2565.40266	-	+	-
	AQAAMSKALELFRNDM	1794.87563	-	-	+		RDKETPSGFTLDDVIQT	1920.9429	+	-	-		VMVGMGQKDSYVGDEAQSKRGILT	2568.26761	-	+	-
	KTEAEMKASEDLKKHG	1800.90395	+	+	+		SMTEQEQQQLIDDHFL	1960.88365	+	-	-		DSGDGVTHNVPIYEGYALPHAIMR	2611.24892	-	+	-
	AKHPSDFGADAQAAMSKA	1801.84171	-	+	+		TPSGFTLDDVIQTGVDNPGHP	2166.02298	+	-	-		AASSSSLEKSYELPDGQVITIGNER	2650.30856	-	+	-
	TGHPETLEKFDKFKH	1812.91588	+	+	+		MEKKLEKGQSIDDMIPAQK	2188.12312	+	-	-		LYANNVMSGGTTMYPGIADRMQKEITALAPSTMKIK	3900.96095	-	+	-
	FTGHPETLEKFDKFK	1822.92539	+	+	+		EQQQLIDDHFLFDKPVSPL	2268.14265	+	+	-
	GHPETLEKFDKFKHL	1824.95226	+	+	+		YYPLKSMTEQEQQQLIDDH	2365.0896	+	-	-
	AIIHVLHAKHPSDFGAD	1826.94276	-	+	+		TEQEQQQLIDDHFLFDKPVS	2416.15468	+	-	-
	FRNDMAAQYKVLGFHG	1852.90427	+	+	+		FDPIIQDRHGGFKPTDKHKTD	2451.22952	+	-	-
	LKTEAEMKASEDLKKH	1856.96654	+	+	+		TEQEQQQLIDDHFLFDKPVSP	2513.20744	+	-	-
	HLKTEAEMKASEDLKK	1856.96654	+	+	+		SMTEQEQQQLIDDHFLFDKPVS	2634.22719	+	+	-
	KHLKTEAEMKASEDLK	1856.96654	+	+	+		KYYPLKSMTEQEQQQLIDDHF	2640.25298	+	-	-
	VLHAKHPSDFGADAQAAM	1864.88901	+	+	+		HKLNFKAEEEYPDLSKHNNHMA	2651.25501	+	-	-
	HAKHPSDFGADAQAAMSK	1867.86351	+	+	+		DKETPSGFTLDDVIQTGVDNPGHPFIM	2929.38043	+	-	-
	FRNDMAAQYKVLGFHG + Oxidation (M)	1868.89919	+	-	+		KGKYYPLKSMTEQEQQQLIDDHFL	2938.45346	+	+	-
	HLAESHANKHKIPVKY	1871.01656	-	-	+		SMTEQEQQQLIDDHFLFDKPVSPLL	2957.44807	+	-	-
	NAWGKVEADVAGHGQEVL	1878.92242	+	+	+		VGSVFDVSNADRLGSSEVEQVQLVVDGVK	3031.54625	+	-	-
	HAKHPSDFGADAQAAMSK + Oxidation (M)	1883.85843	-	-	+		YYPLKSMTEQEQQQLIDDHFLFDKP	3112.48517	+	-	-
	TEAEMKASEDLKKHGNT	1887.8996	+	+	+		YYPLKSMTEQEQQQLIDDHFLFDKPVS	3298.58562	+	-	-
	AIIHVLHAKHPSDFGADA	1897.97987	-	-	+		LRDKETPSGFTLDDVIQTGVDNPGHPFIMT	3299.61328	+	-	-
	LKTEAEMKASEDLKKHG	1913.98801	+	+	+		YPLKSMTEQEQQQLIDDHFLFDKPVSPL	3345.65912	+	-	-
	KTEAEMKASEDLKKHGN	1914.94687	+	+	+		GKYYPLKSMTEQEQQQLIDDHFLFDKPVS	3483.70204	+	+	-
	TGHPETLEKFDKFKHL	1925.99994	+	+	+		SLTGEFKGKYYPLKSMTEQEQQQLIDDHFL	3572.74971	+	+	-
	LKTEAEMKASEDLKKHG + Oxidation (M)	1929.98293	-	+	+		KGKYYPLKSMTEQEQQQLIDDHFLFDKPVSPL	3821.93382	+	-	-
	HAKHPSDFGADAQAAMSKA	1938.90062	+	+	+		SLTGEFKGKYYPLKSMTEQEQQQLIDDHFLFDKPVSPL	4456.23007	+	-	-
	HPSDFGADAQAAMSKALEL	1957.92035	+	+	+		FGNTHNK	816.38785	-	+	-
	FTGHPETLEKFDKFKH	1959.9843	+	+	+		LVVDGVKL	841.52731	-	+	-
	KHLKTEAEMKASEDLKK	1985.06149	+	+	+		GGFKPTDK	848.43922	-	+	-
	HLKTEAEMKASEDLKKH	1994.02545	+	+	+		SLTGEFKGK	965.51819	-	+	-
	KTEAEMKASEDLKKHGNT	2015.99455	+	+	+		HGGFKPTDK	985.49814	-	+	-
	LKTEAEMKASEDLKKHGN	2028.03093	-	+	+		HLSKHPKF	992.55557	-	+	-
	HLKTEAEMKASEDLKKHG	2051.04692	+	+	+		SKHPKFEE	1000.49777	-	+	-
	HAKHPSDFGADAQAAMSKAL	2051.98468	-	+	+		DRHGGFKPTD	1128.53123	-	+	-
	EVKHLAESHANKHKIPVK	2064.1592	-	-	+		KALTLEIYKK	1205.73831	-	+	-
	FTGHPETLEKFDKFKHL	2073.06836	+	+	+		HKTDLNHENL	1219.59453	-	+	-
	VLHAKHPSDFGADAQAAMSK	2080.01599	+	+	+		HPKFEEILTR	1268.6877	-	+	-
	KHPSDFGADAQAAMSKALEL	2086.01531	+	-	+		GTGLRGGVHVKLAH	1400.80008	-	+	-
	VLNAWGKVEADVAGHGQEVL	2091.07491	+	+	+		KRGTGGVDTAAVGSVF	1520.79474	-	+	-
	AIIHVLHAKHPSDFGADAQA	2097.07556	-	-	+		LSKHPKFEEILTR	1596.89874	-	+	-
	KTEAEMKASEDLKKHGNTV	2115.06297	+	+	+		DVIQTGVDNPGHPFI	1607.7944	-	+	-
	KHLKTEAEMKASEDLKKH	2122.12041	+	+	+		LAHLSKHPKFEEIL	1660.93004	-	+	-
	LAESHANKHKIPVKYLEF	2123.15271	+	+	+		QLIDDHFLFDKPVSP	1769.89885	-	+	-
	LKTEAEMKASEDLKKHGNT	2129.07861	+	+	+		QLIDDHFLFDKPVSPL	1882.98291	-	+	-
	ISDAIIHVLHAKHPSDFGAD	2142.0858	-	+	+		QQLIDDHFLFDKPVSPL	2011.04149	-	+	-
	NAWGKVEADVAGHGQEVLIR	2148.10759	-	+	+		LRDKETPSGFTLDDVIQT	2034.02696	-	+	-
	VLHAKHPSDFGADAQAAMSKA	2151.0531	+	+	+		GFTLDDVIQTGVDNPGHPFI	2141.04298	-	+	-
	AKHPSDFGADAQAAMSKALEL	2157.05241	+	+	+		VKLAHLSKHPKFEEILTR	2145.2422	-	+	-
	ASEDLKKHGNTVLTALGGILK	2164.22154	-	+	+		QEQQQLIDDHFLFDKPVSPL	2396.20123	-	+	-
	AIIHVLHAKHPSDFGADAQAA	2168.11267	-	-	+		YYPLKSMTEQEQQQLIDDHFL	2625.24208	-	+	-
	KHLKTEAEMKASEDLKKHG	2179.14188	+	+	+		KSMTEQEQQQLIDDHFLFDKPVSPL	2972.45897	-	+	-
	HAKHPSDFGADAQAAMSKALE	2181.02727	+	+	+		PFGNTHNKHKLNFKAEEEYPDLSKH	2979.46271	-	+	-
	FTGHPETLEKFDKFKHLK	2201.16331	+	+	+		FDPIIQDRHGGFKPTDKHKTDLNHENLK	3299.67995	-	+	-
	HLAESHANKHKIPVKYLEF	2260.21162	+	-	+		LVVDGVKLMVEMEKKLEKGQSIDDMIPAQK	3370.79137	-	+	-
	HLKTEAEMKASEDLKKHGNT	2266.13753	+	+	+		GKYYPLKSMTEQEQQQLIDDHFLFDKPVSPL	3693.83887	-	+	-
	HAKHPSDFGADAQAAMSKALEL	2294.11133	+	+	+		LEIYKKLRDKETPSGFTLDDVIQTGVDNPGHPF	3728.905	-	+	-
	FTGHPETLEKFDKFKHLKT	2302.211	-	-	+		FKGKYYPLKSMTEQEQQQLIDDHFLFDKPVSPL	3969.00224	-	+	-
	GGILKKKGHHEAEVKHLAESH	2304.24506	+	-	+		ALTLEIYKKLRDKETPSGFTLDDVIQTGVDNPGHPF	4014.07385	-	+	-
	KTEAEMKASEDLKKHGNTVLT	2329.19472	-	+	+		EEYPDLSKHNNHMAKALTLEIYKKLRDKETPSGFTLDDVIQTGVDNPGHPF	5807.88933	-	+	-
	ISDAIIHVLHAKHPSDFGADAQ	2341.18149	-	+	+
	IRLFTGHPETLEKFDKFKH	2342.25353	-	+	+
	VLHAKHPSDFGADAQAAMSKALE	2393.17975	+	+	+
	KHLKTEAEMKASEDLKKHGNT	2394.23248	+	+	+
	FTGHPETLEKFDKFKHLKTE	2431.25359	-	+	+
	IIHVLHAKHPSDFGADAQAAMSK	2443.24303	+	+	+
	IRLFTGHPETLEKFDKFKHL	2455.33759	+	+	+
	GGILKKKGHHEAEVKHLAESHAN	2489.32509	-	-	+
	FTGHPETLEKFDKFKHLKTEA	2502.2907	-	-	+
	VLHAKHPSDFGADAQAAMSKALEL	2506.26381	-	+	+
	DKFKHLKTEAEMKASEDLKKH	2512.31073	-	-	+
	AIIHVLHAKHPSDFGADAQAAMSK	2514.28014	+	+	+
	AIIHVLHAKHPSDFGADAQAAMSK + Oxidation (M)	2530.27506	+	+	+
	DKFKHLKTEAEMKASEDLKKHG	2569.3322	+	+	+
	AIIHVLHAKHPSDFGADAQAAMSKA	2585.31725	+	+	+
	FTGHPETLEKFDKFKHLKTEAE	2631.33328	-	-	+
	GHPETLEKFDKFKHLKTEAEMK	2642.35261	-	-	+
	SDAIIHVLHAKHPSDFGADAQAAMSK	2716.33911	+	-	+
	FDKFKHLKTEAEMKASEDLKKHG	2716.40062	+	+	+
	TGHPETLEKFDKFKHLKTEAEMK	2743.4003	-	+	+
	FTGHPETLEKFDKFKHLKTEAEM	2762.37376	+	-	+
	SDAIIHVLHAKHPSDFGADAQAAMSKA	2787.37622	-	-	+
	AIIHVLHAKHPSDFGADAQAAMSKALE	2827.44389	-	-	+
	ISDAIIHVLHAKHPSDFGADAQAAMSK	2829.42317	+	+	+
	ISDAIIHVLHAKHPSDFGADAQAAMSKA	2900.46028	+	+	+
	AIIHVLHAKHPSDFGADAQAAMSKALEL	2940.52795	-	+	+
	HAKHPSDFGADAQAAMSKALELFRNDM	2957.39121	+	+	+
	KTEAEMKASEDLKKHGNTVLTALGGILK	2981.6219	+	-	+
	ISDAIIHVLHAKHPSDFGADAQAAMSKAL	3013.54434	-	+	+
	DAIIHVLHAKHPSDFGADAQAAMSKALEL	3055.5549	-	+	+
	EFISDAIIHVLHAKHPSDFGADAQAAMSK	3105.53418	-	+	+
	ISDAIIHVLHAKHPSDFGADAQAAMSKALE	3142.58693	+	+	+
	ISDAIIHVLHAKHPSDFGADAQAAMSKALEL	3255.67099	+	+	+
	FTGHPETLEKFDKFKHLKTEAEMKASEDLKK	3661.88136	-	-	+
	FTGHPETLEKFDKFKHLKTEAEMKASEDLKKHG	3855.96175	-	-	+
	KKKGHHE	862.47731	+	+	-
	KKKGHHEA	933.51442	+	+	-
	KKKGHHEAE	1062.55701	+	+	-
	EFISDAIIHV	1142.59717	+	-	-
	IPVKYLEFISD	1322.71219	+	-	-
	EMKASEDLKKHG	1371.68161	+	-	-
	AEMKASEDLKKHG + Oxidation (M)	1458.71364	+	-	-
	PETLEKFDKFKHL	1630.87187	+	-	-
	DFGADAQAAMSKALEL	1636.77664	+	+	-
	RNDMAAQYKVLGFHG	1705.83585	+	-	-
	HLAESHANKHKIPVK	1707.95323	+	+	-
	LKTEAEMKASEDLKK + Oxidation (M)	1735.90254	+	-	-
	HAKHPSDFGADAQAAMS	1739.76856	+	-	-
	VLNAWGKVEADVAGHGQE	1878.92242	+	-	-
	IRLFTGHPETLEKFDK	1930.03124	+	+	-
	VLNAWGKVEADVAGHGQEV	1977.99085	+	-	-
	TEAEMKASEDLKKHGNTV	1986.96802	+	-	-
	RLFTGHPETLEKFDKFKHL	2342.25353	+	-	-
	GHHEAEVKHLAESHANKHKIPVKY	2758.44151	+	-	-
	HAKHPSDFGADAQAAMSKALELFRND	2826.35072	+	+	-
	EDLKKH	768.41298	-	+	-
	DAIIHVL	779.45413	-	+	-
	FDKFKH	820.42317	-	+	-
	ESHANKHK	949.47295	-	+	-
	GHHEAEVKH	1042.49443	-	+	-
	NKHKIPVKY	1125.66583	-	+	-
	SHANKHKIPV	1129.63561	-	+	-
	ESHANKHKIPV	1258.67819	-	+	-
	KASEDLKKHGNT	1326.68915	-	+	-
	AESHANKHKIPV	1329.7153	-	+	-
	FRNDMAAQYKV	1341.64993	-	+	-
	LKTEAEMKASED	1350.63365	-	+	-
	KHKIPVKYLEF	1400.81798	-	+	-
	FRNDMAAQYKVL	1454.73399	-	+	-
	NAWGKVEADVAGHGQ	1537.72736	-	+	-
	VLHAKHPSDFGADAQ	1591.77431	-	+	-
	AWGKVEADVAGHGQEV	1651.79544	-	+	-
	VLHAKHPSDFGADAQA	1662.81142	-	+	-
	SHANKHKIPVKYLEF	1809.98895	-	+	-
	LAESHANKHKIPVKYL	1847.0417	-	+	-
	LKTEAEMKASEDLKKH + Oxidation (M)	1872.96146	-	+	-
	LFTGHPETLEKFDKFKH	2073.06836	-	+	-
	LKTEAEMKASEDLKKHGNTV	2228.14703	-	+	-
	KTEAEMKASEDLKKHGNTVL	2228.14703	-	+	-
	LKTEAEMKASEDLKKHGNTVL	2341.23109	-	+	-
	KFKHLKTEAEMKASEDLKKHG	2454.30525	-	+	-
	FKHLKTEAEMKASEDLKKHGNT	2541.3009	-	+	-
	HPSDFGADAQAAMSKALELFRNDM	2621.20023	-	+	-
	DAIIHVLHAKHPSDFGADAQAAMSK	2629.30708	-	+	-
	KFKHLKTEAEMKASEDLKKHGNT	2669.39586	-	+	-
	AIIHVLHAKHPSDFGADAQAAMSKAL	2698.40131	-	+	-
	DAIIHVLHAKHPSDFGADAQAAMSKA	2700.34419	-	+	-
	KFDKFKHLKTEAEMKASEDLKKHG	2844.49558	-	+	-
	FTGHPETLEKFDKFKHLKTEAEMK	2890.46872	-	+	-
	FDKFKHLKTEAEMKASEDLKKHGNT	2931.49123	-	+	-
	FISDAIIHVLHAKHPSDFGADAQAAMSK	2976.49159	-	+	-
	VLHAKHPSDFGADAQAAMSKALELFRND	3038.5032	-	+	-
	VLHAKHPSDFGADAQAAMSKALELFRNDM	3169.54369	-	+	-
	GGILKKKGHHEAEVKHLAESHANKHKIPVK	3319.87412	-	+	-
	EFISDAIIHVLHAKHPSDFGADAQAAMSKALE	3418.69794	-	+	-
	GGILKKKGHHEAEVKHLAESHANKHKIPVKY	3482.93744	-	+	-
[truncated: 16 more columns]
